# Supplementary material for: Non-targeted and targeted metabolomics approaches to diagnosing lung cancer and predicting patient prognosis
Source: PubMed Central journal article supplement (PMC5325375; doi:10.18632/oncotarget.11521), 2016-08-23
Supplement: oncotarget-07-63437-s001.pdf [file oncotarget-07-63437-s001.pdf]

## Non-targeted and targeted metabolomics approaches to diagnosing lung cancer and predicting patient prognosis

### Supplementary Materials

**Supplementary Table S1: Concentrations of 23 serum free amino acids in lung cancer patients and healthy controls<sup>a</sup>**

| Amino acids          | Concentrations ( $\mu\text{mol}\cdot\text{L}^{-1}$ , $n = 25$ ) |                           |
|----------------------|-----------------------------------------------------------------|---------------------------|
|                      | Healthy control                                                 | Patients with lung cancer |
| Aspartic acid (Asp)  | 14.88 $\pm$ 3.88                                                | 28.17 $\pm$ 8.55          |
| Glutamic acid (Glu)  | 81.28 $\pm$ 29.77                                               | 145.81 $\pm$ 59.05        |
| Hydroxyproline (Hyp) | 11.11 $\pm$ 4.78                                                | 19.10 $\pm$ 11.38         |
| Asparagine (Asn)     | 8.28 $\pm$ 4.08                                                 | 29.79 $\pm$ 7.53          |
| Glutamine (Gln)      | 93.39 $\pm$ 20.95                                               | 126.62 $\pm$ 17.81        |
| Serine (Ser)         | 234.23 $\pm$ 45.70                                              | 202.94 $\pm$ 40.52        |
| Glycine (Gly)        | 258.29 $\pm$ 44.50                                              | 241.24 $\pm$ 34.76        |
| Arginine (Arg)       | 9.75 $\pm$ 1.77                                                 | 11.08 $\pm$ 3.32          |
| Threonine (Thr)      | 67.91 $\pm$ 9.35                                                | 58.22 $\pm$ 18.25         |
| Histidine (His)      | 51.80 $\pm$ 8.21                                                | 68.11 $\pm$ 19.34         |
| Taurine (Tau)        | 76.23 $\pm$ 17.97                                               | 79.55 $\pm$ 14.62         |
| Alanine (Ala)        | 374.07 $\pm$ 65.98                                              | 372.26 $\pm$ 90.41        |
| Proline (Pro)        | 154.90 $\pm$ 47.58                                              | 163.16 $\pm$ 32.46        |
| Valine (Val)         | 244.80 $\pm$ 48.52                                              | 208.41 $\pm$ 32.35        |
| Cysteine (Cys)       | 13.48 $\pm$ 5.93                                                | 25.46 $\pm$ 7.48          |
| Methionine (Met)     | 14.62 $\pm$ 3.94                                                | 7.74 $\pm$ 0.66           |
| Ornithine (Orn)      | 88.20 $\pm$ 14.19                                               | 74.63 $\pm$ 14.73         |
| Isoleucine (Ile)     | 102.27 $\pm$ 21.53                                              | 157.18 $\pm$ 19.38        |
| Tryptophan (Trp)     | 41.37 $\pm$ 13.07                                               | 19.38 $\pm$ 3.47          |
| Leucine (Leu)        | 59.07 $\pm$ 7.42                                                | 117.35 $\pm$ 18.48        |
| Phenylalanine (Phe)  | 43.95 $\pm$ 6.74                                                | 60.21 $\pm$ 24.40         |
| Lysine (Lys)         | 69.72 $\pm$ 11.16                                               | 93.58 $\pm$ 25.72         |
| Tyrosine (Tyr)       | 56.69 $\pm$ 9.09                                                | 77.22 $\pm$ 28.55         |

<sup>a</sup>The concentrations are presented as mean  $\pm$  standard deviation.
